# Supplementary material for: A synthesis of space–time variability in multicomponent flood response
Source: Copernicus journal article supplement (doi:10.5194/hess-21-2277-2017), 2017-05-03
Supplement: Supplementary file [file hess-21-2277-2017-supplement-title-page.pdf › hess-21-2277-2017-supplement-title-page.pdf]

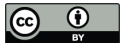

## *Supplement of*

# **A synthesis of space–time variability in multicomponent flood response**

**Yiwen Mei et al.**

*Correspondence to:* Emmanouil N. Anagnostou ([emmanouil.anagnostou@uconn.edu](mailto:emmanouil.anagnostou@uconn.edu))

- [hess-21-2277-2017-supplement-title-page.pdf](#)
- Supplemental Materials
  - Demo\_Data
    - \* 02083000.csv
    - \* 02083000\_mask.tif
    - \* EAct
    - \* RainAct
    - \* SM
    - \* Theta.mat
  - Functions
    - \* AFC.m
    - \* AFF.m
    - \* AFS.m
    - \* AFV.m
  - Mei\_etal\_2017.m

The copyright of individual parts of the supplement might differ from the CC-BY 3.0 licence.
